# Supplementary material for: Carbon accumulation rates of Holocene peatlands in central–eastern Europe document the driving role of human impact over the past 4000 years
Source: Copernicus journal article supplement (doi:10.5194/cp-17-2633-2021), 2021-12-21
Supplement: Supplementary file 1 [file cp-17-2633-2021-supplement.pdf]

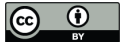

*Supplement of*

**Carbon accumulation rates of Holocene peatlands in central–eastern Europe document the driving role of human impact over the past 4000 years**

**Jack Longman et al.**

*Correspondence to:* Jack Longman ([jack.longman@uni-oldenburg.de](mailto:jack.longman@uni-oldenburg.de))

The copyright of individual parts of the supplement might differ from the article licence.

## Radiocarbon dating

For samples dated at Horia Hulubei National Institute for Physics and Nuclear Engineering, Magurele, Romania (sample code RoAMS), the standard acid-base-acid (ABA) extraction was employed for removing inorganic carbon and humic substances. The protocol follows the steps of the organic materials pretreatment described in Sava et al. (2019). Briefly, the *Sphagnum* stems were inspected and selected from the bulk sample under the microscope, followed by an acid leaching (3.7% HCl, T = 80 °C, 20 min), ultrapure water rinsing (MilliQ®, Millipore, USA), alkali treatment (0.8% NaOH, T=80 °C, 20 min), ultrapure water rinsing, acid treatment (3.7% HCl, T = 80 °C, 1 hr), followed by ultrapure water washing to neutral pH. At the end of the protocol, the samples were dried. During this protocol the inorganic carbon is dissolved and discarded in acidic solution, the soluble organic carbon (humic acid) is eliminated in the alkali solution, while the alkali insoluble organic carbon (humin) is washed with ultrapure water.

The graphite from organic compounds was produced using an AGEIII system (Ionplus, Switzerland), coupled with an elemental analyzer (VarioMicroCube, Elementar, Germany) for sample combustion (Wacker et al., 2010). Following the graphitization step, the peat graphite was measured on a 1 MV AMS system together with a batch of charcoal blanks and modern carbon reference material (NIST SRM 4990C, Oxalic Acid II). The radiocarbon ages were calculated according to Stuiver and Polach (1977) considering blank and fractionation corrections and subsequently calibrated on IntCal20 atmospheric curve (Reimer et al., 2020). All age-depth models were created using Bacon (Blaauw & Christen, 2011) in RStudio (RStudio Team, 2020).

## Supplementary Figures

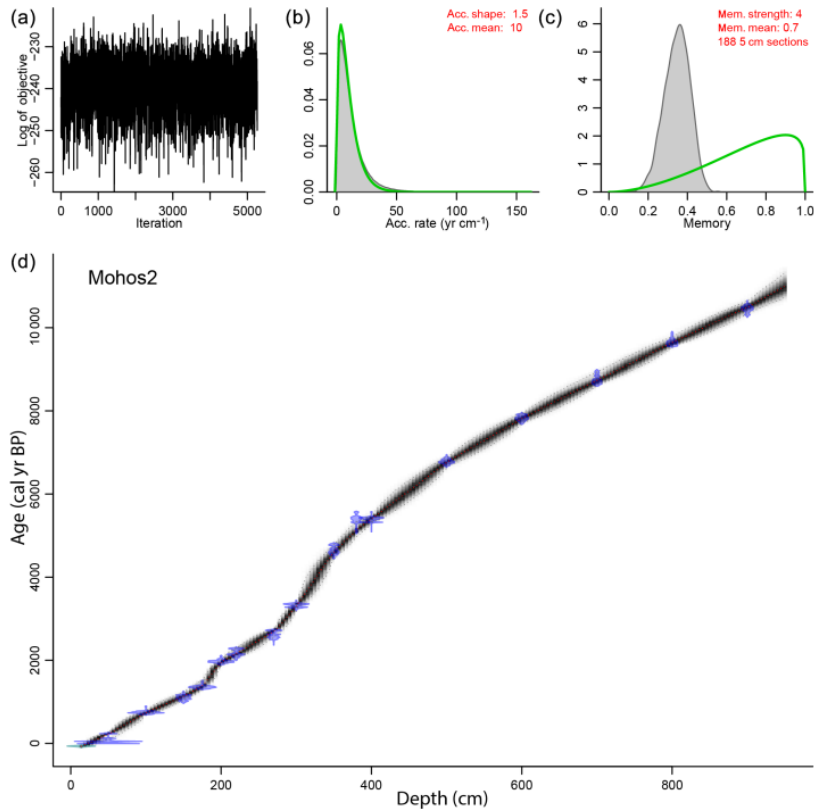

Supplementary Figure 1: Age–depth model of Mohos (MOH) peat record, as determined via Bacon (Blaauw & Christen, 2011), using IntCal20 (Reimer et al., 2020). (a) Graph indicates Markov chain Monte Carlo iterations. Also in (b) and (c) are prior (green line) and posterior (grey histogram) distributions for the accumulation rate (b) and memory (c). For panel (d), calibrated radiocarbon ages are in blue. The age–depth model is outlined in grey, with darker grey indicating more likely calendar ages. Grey stippled lines show 95 % confidence intervals, and the red curve indicates the single best model used in this work. The base of this model (between the last radiocarbon date and basal peat) is interpolated, and so carbon accumulation rates calculated from these depths should be treated with caution.

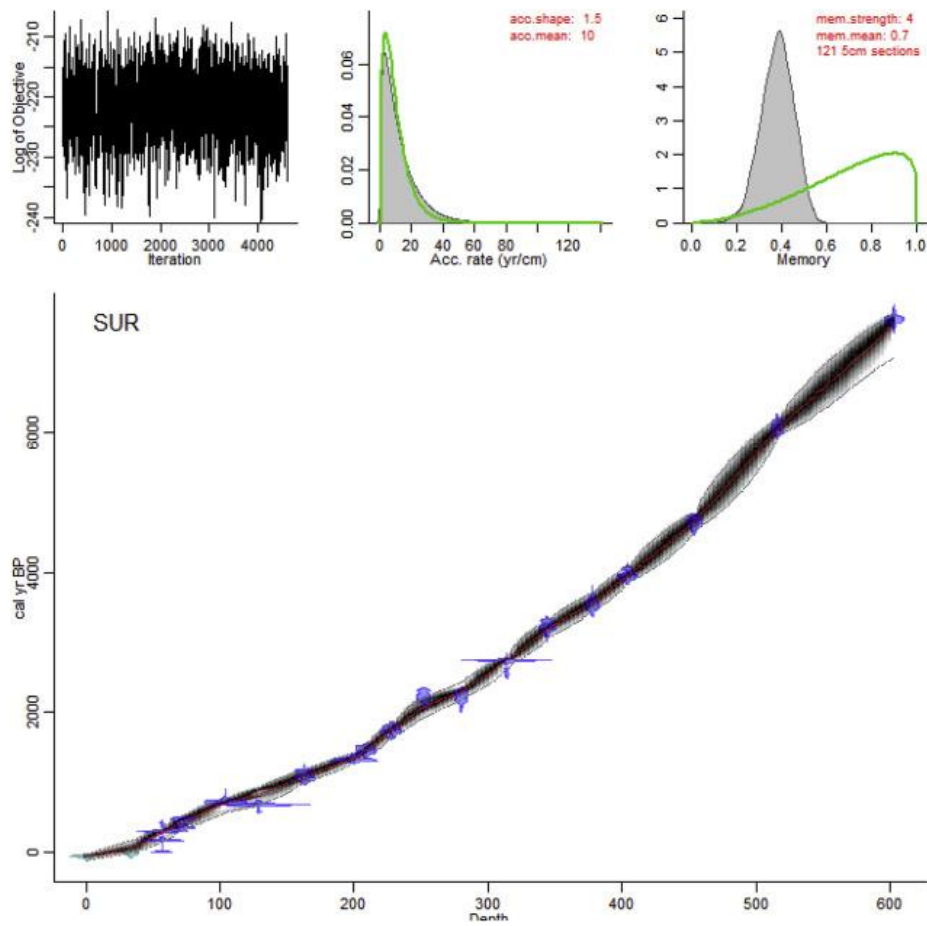

Supplementary Figure 2: Age-depth model of Sureanu (SUR) peat bog. Panels are the same as in Supplementary Figure 1.

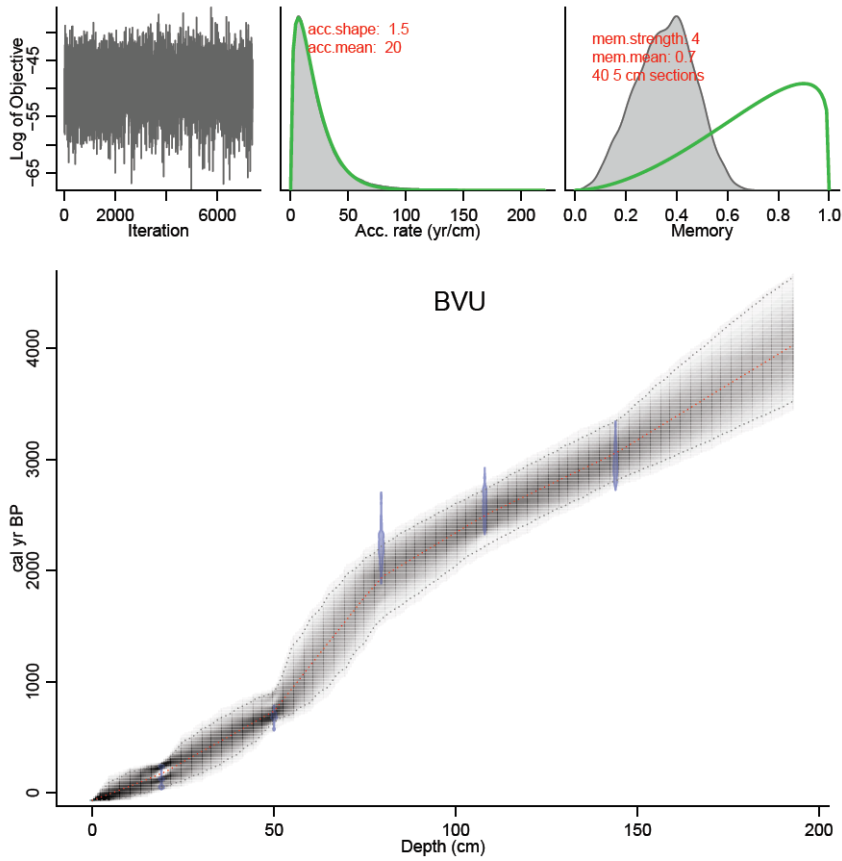

Supplementary Figure 3: Age-depth model of Baia Vulturilor (BVU) peat bog. Panels are the same as in Supplementary Figure 1. The base of this model (between the last radiocarbon date and basal peat) is interpolated, and so carbon accumulation rates calculated from these depths should be treated with caution.

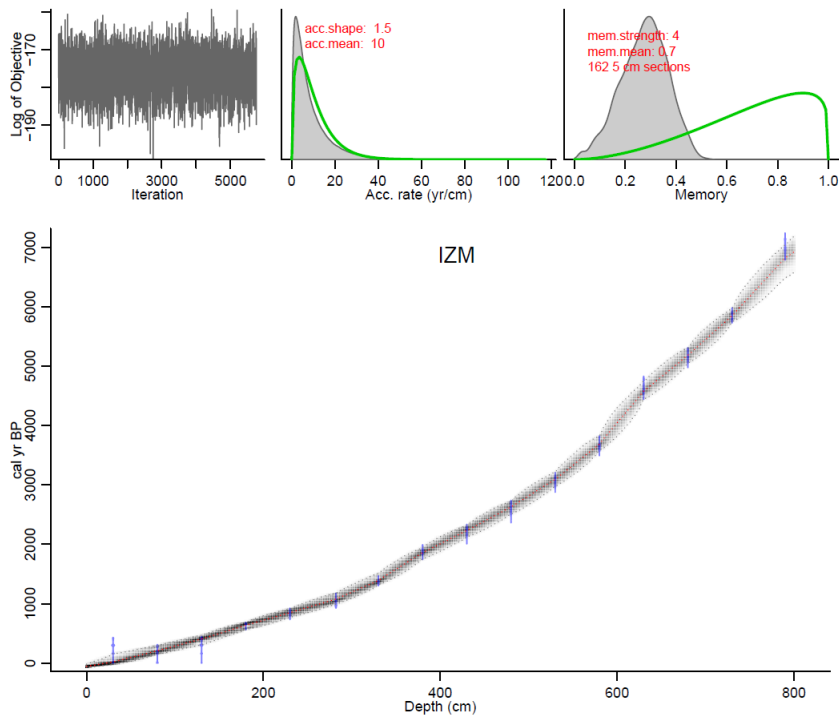

Supplementary Figure 4: Age-depth model of Iezerul Mare (IZM) peat bog. Panels are the same as in Supplementary Figure 1. The base of this model (between the last radiocarbon date and basal peat) is interpolated, and so carbon accumulation rates calculated from these depths should be treated with caution.

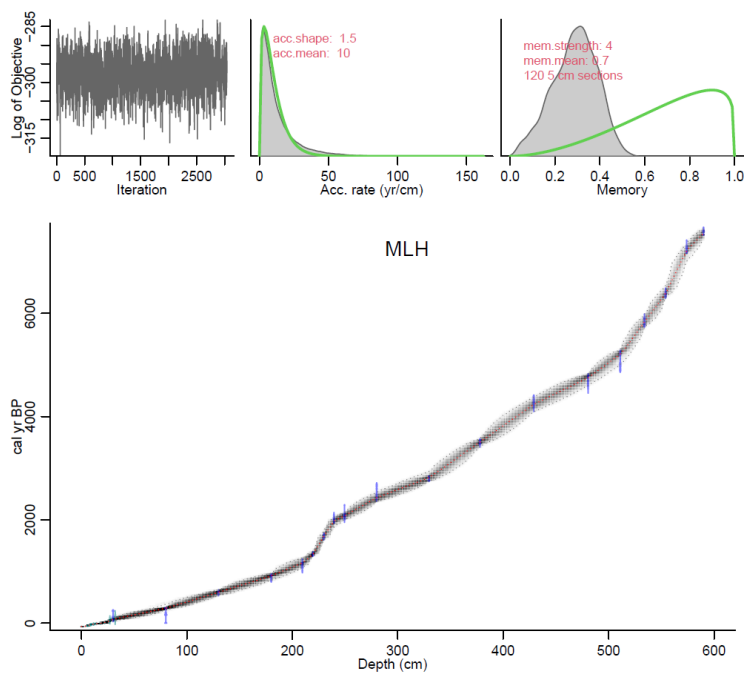

Supplementary Figure 5: Age-depth model of Mluha (MLH) peat bog. Panels are the same as in Supplementary Figure 1.

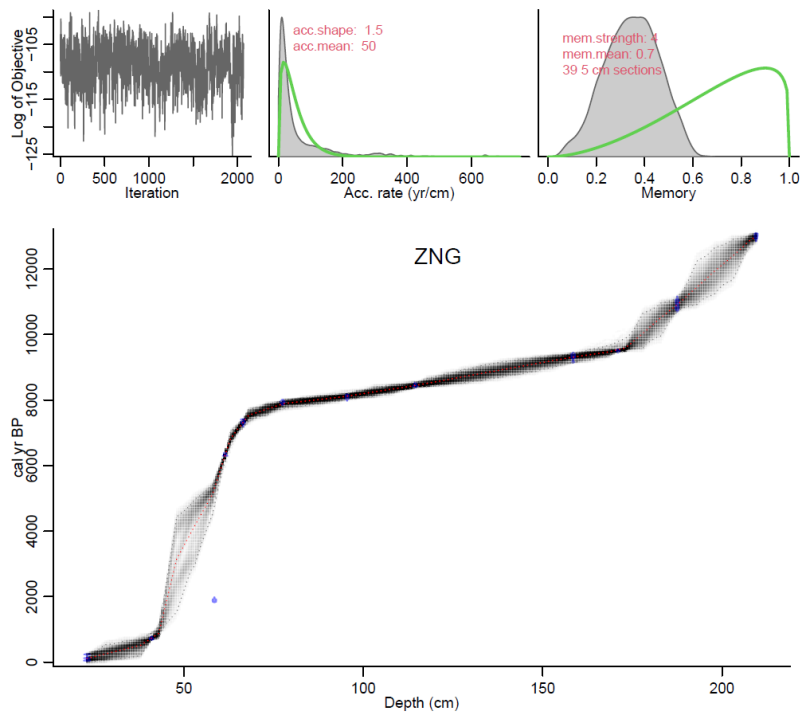

Supplementary Figure 6: Age-depth model of Zanoage Rosie (ZNG) peat bog. Panels are the same as in Supplementary Figure 1. For the uppermost section of peat, the model interpolates between coring date and the first radiocarbon date

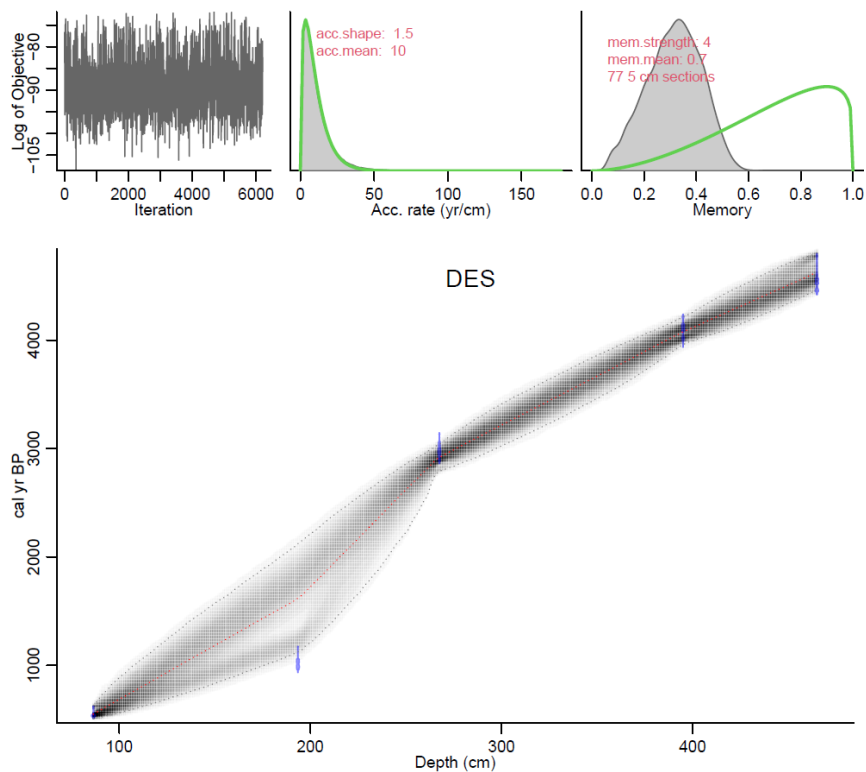

Supplementary Figure 7: Age-depth model of Despotovac (DES) peat bog. Panels are the same as in Supplementary Figure 1. For the uppermost section of peat, the model interpolates between coring date and the first radiocarbon date

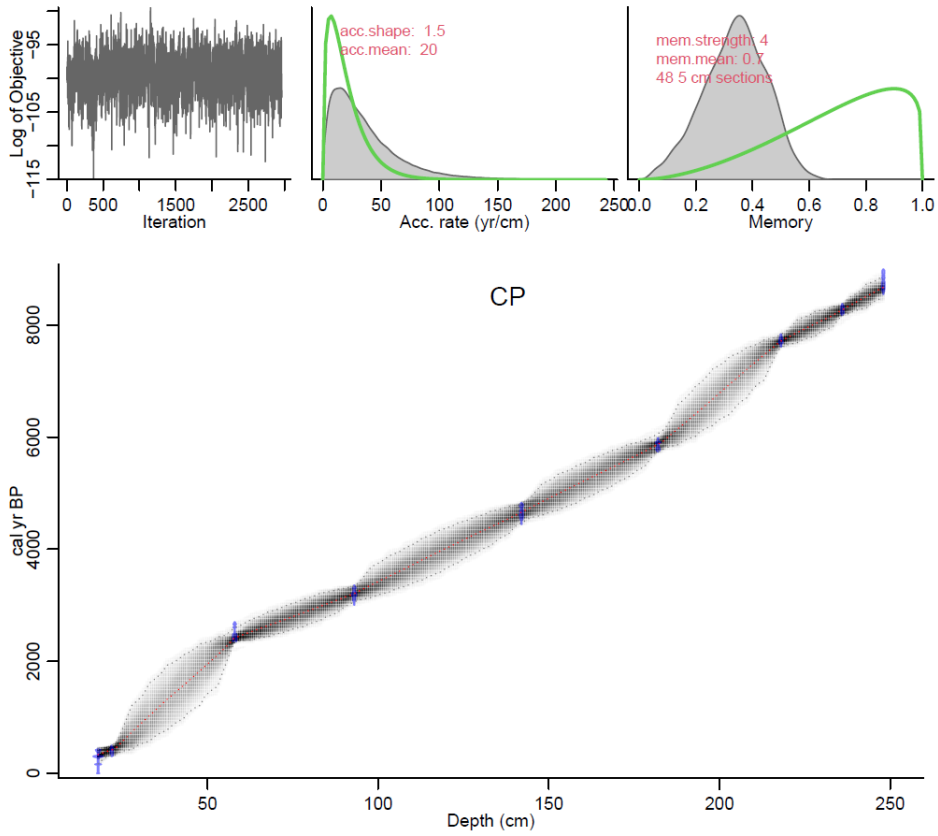

Supplementary Figure 8: Age-depth model of Crveni Potok (CP) peat bog. Panels are the same as in Supplementary Figure 1.

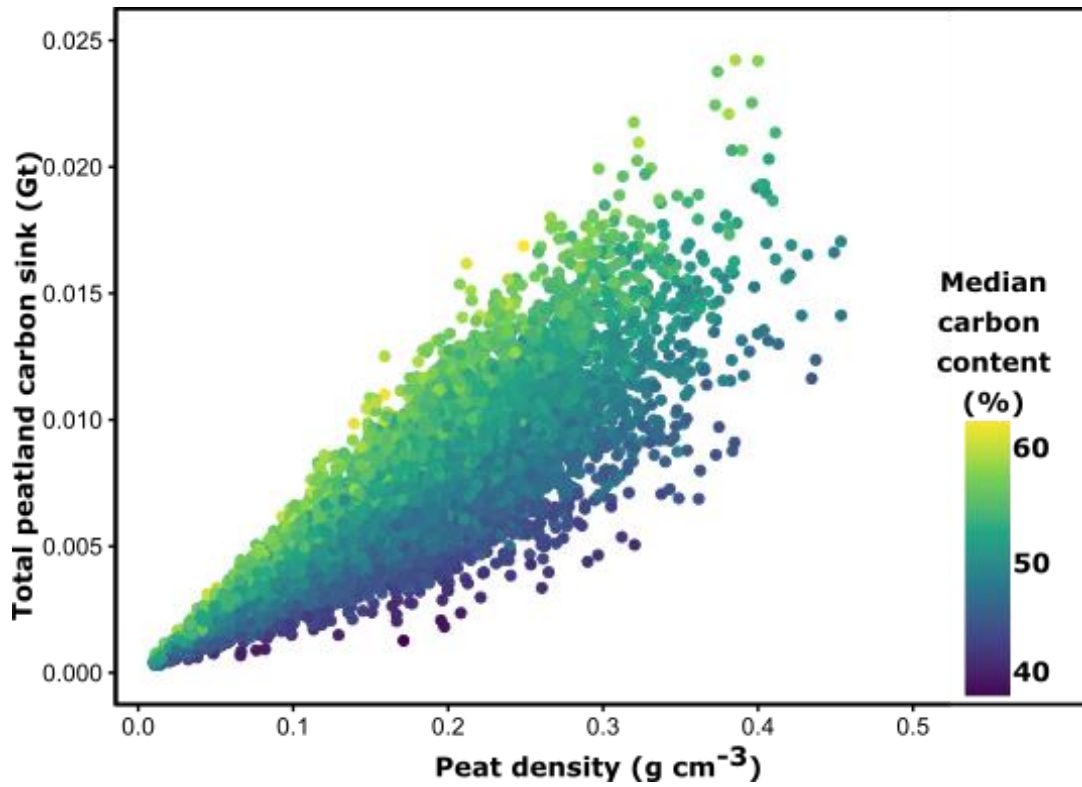



Supplementary Figure 9: Output of Monte Carlo modelling of total carbon sink represented by Romania peat bogs. The total carbon sink is calculated 10,000 times to cover the range of error for each of the variables (see Table 3).

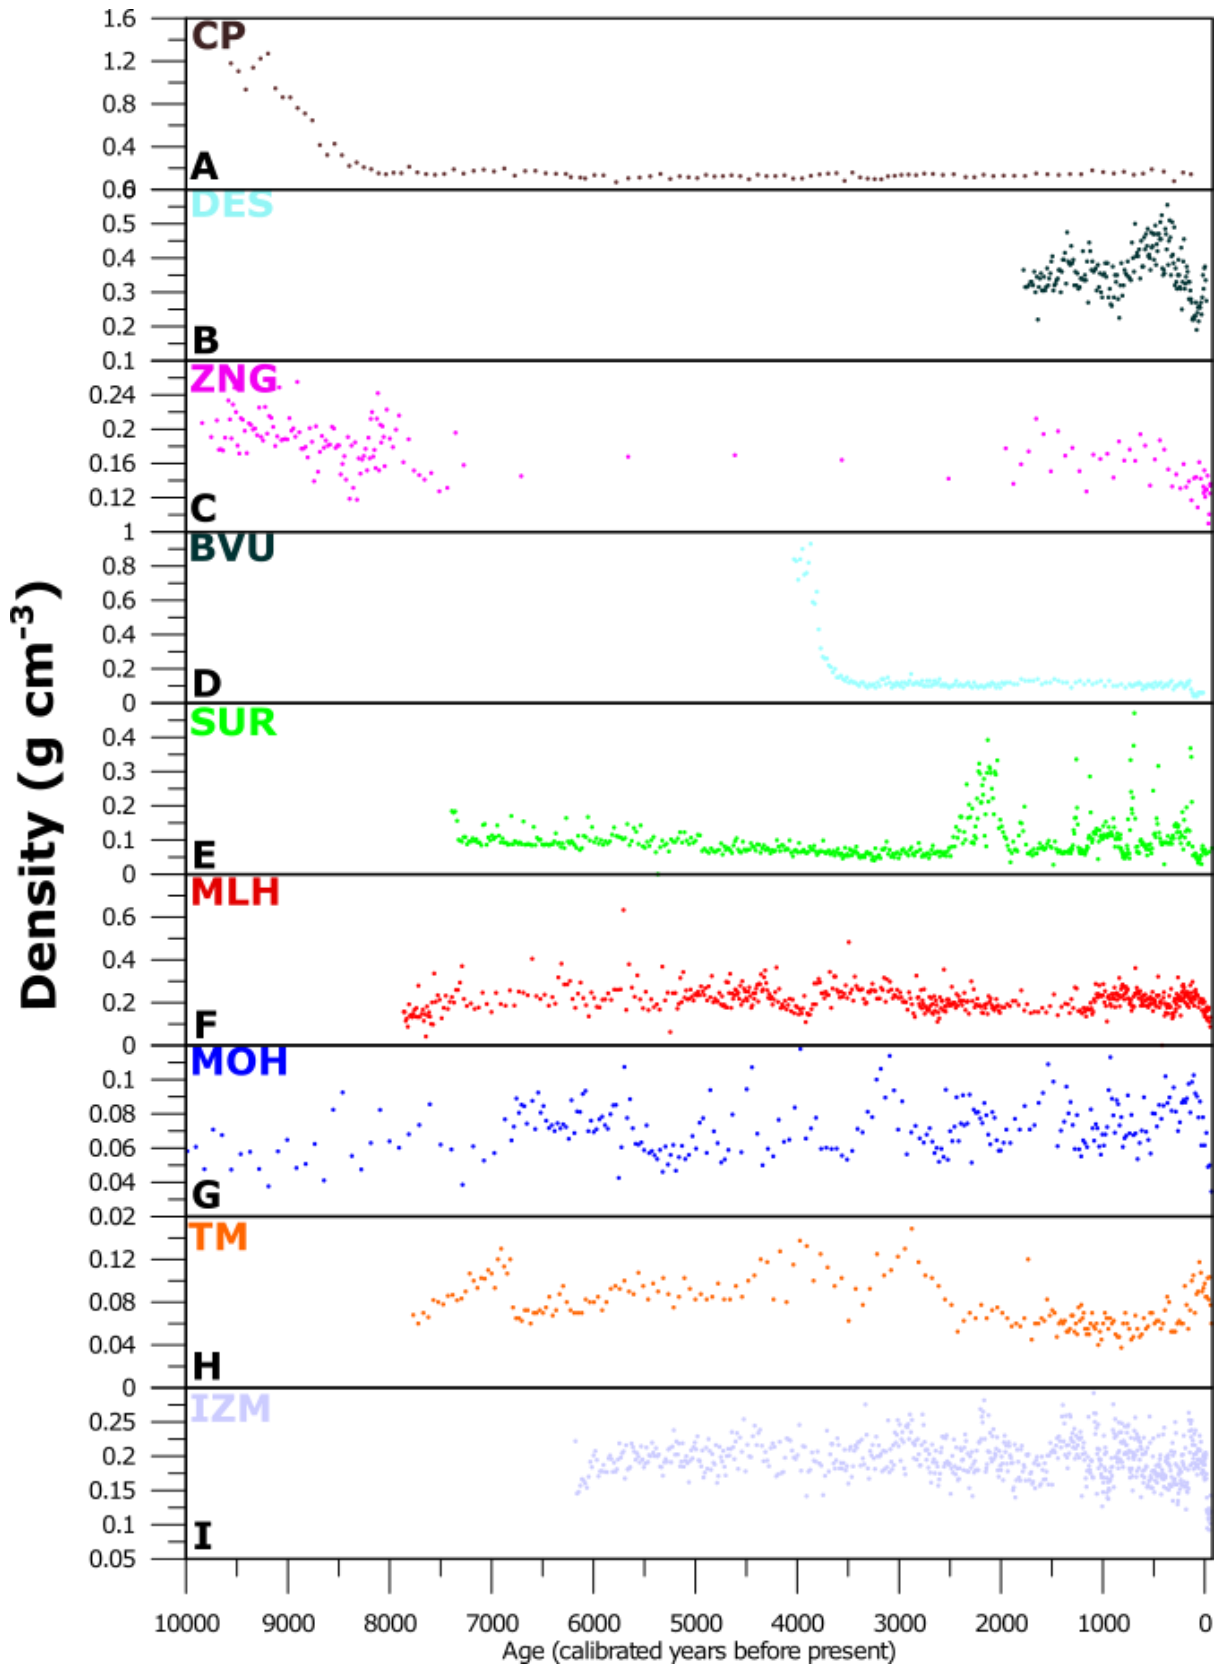

Supplementary Figure 10: Bulk density values for all bogs used in this study.

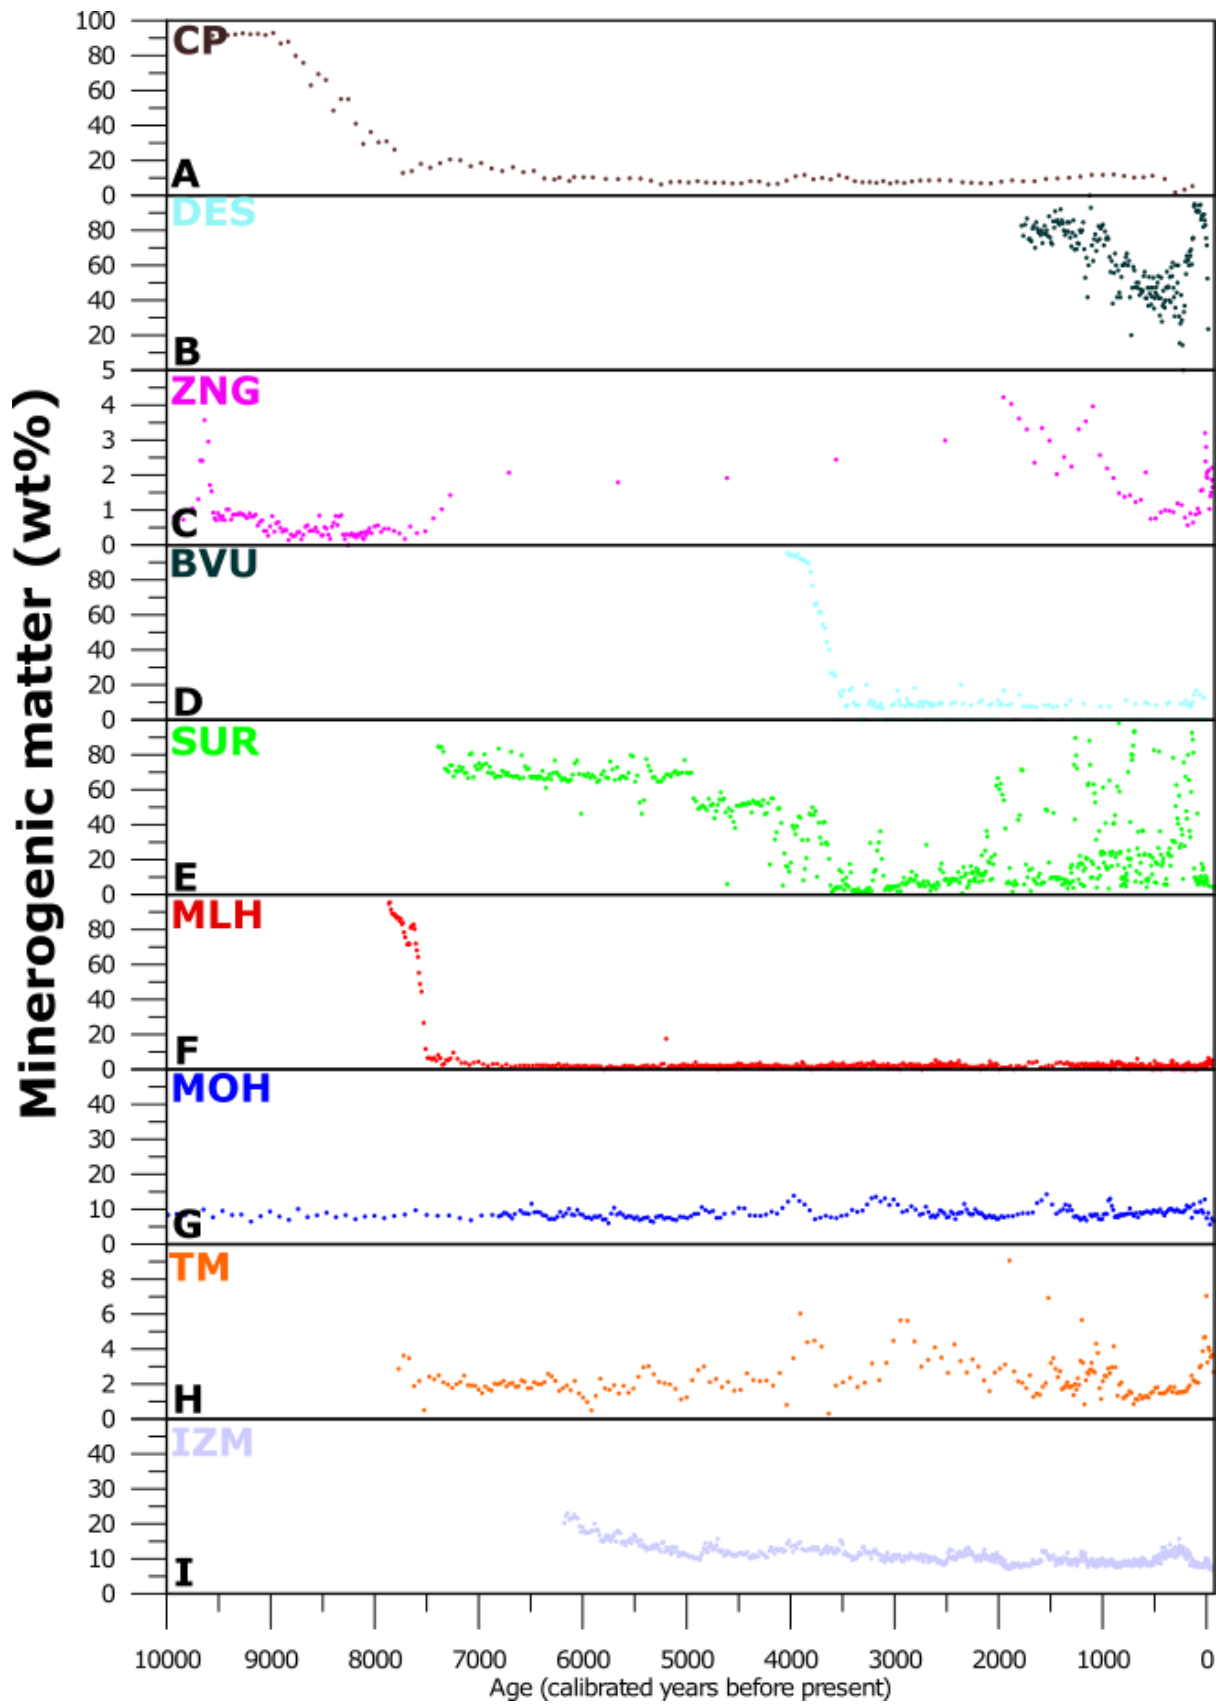

Supplementary Figure 11: Minerogenic matter content (what remains after ashing of samples) for all bogs used in this study.

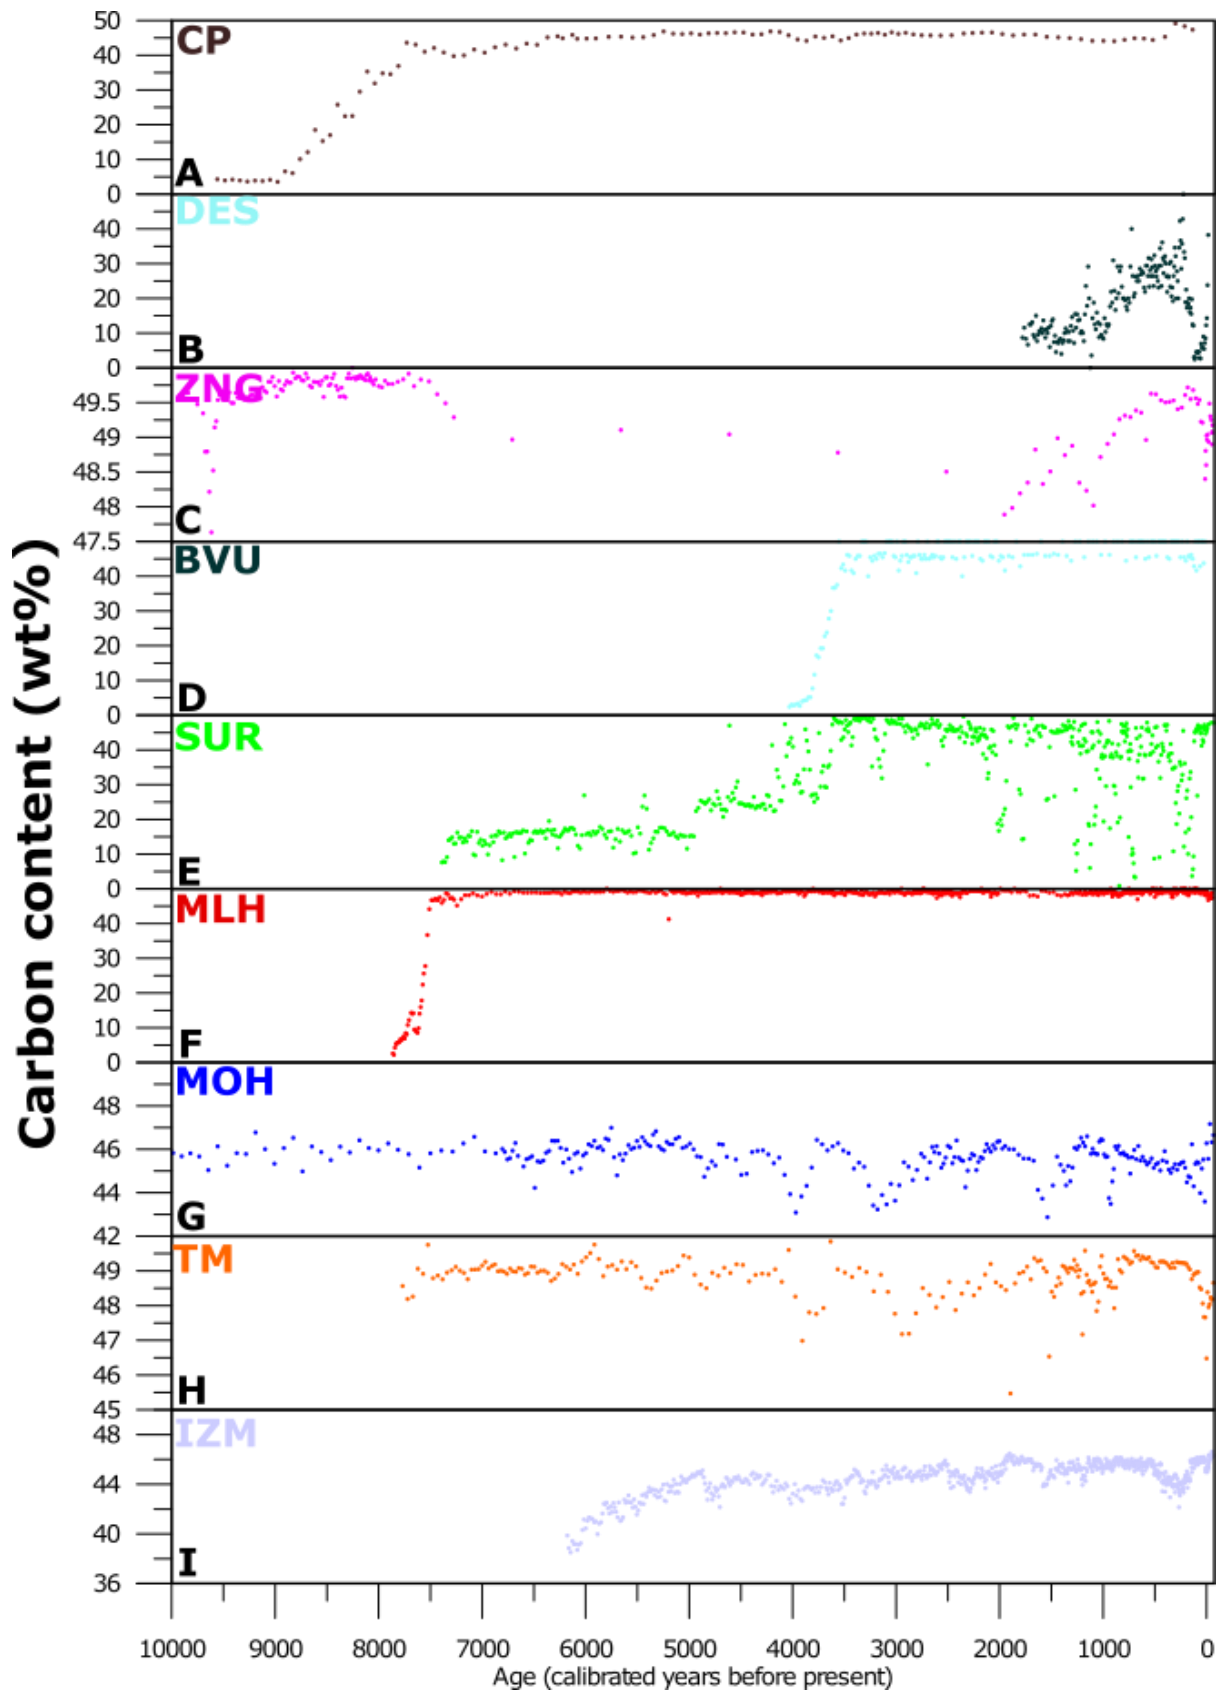

Supplementary Figure 12: Carbon content (assumed to be 50% of all organic matter) for all bogs used in this study.

## Supplementary Tables

Supplementary Table 1: All radiocarbon dates used in this study.

### Sureanu

| Lab Code  | Depth (cm) | Material dated             | $^{14}\text{C}$ Age ( $\pm 1\sigma$ ) | Remarks |
|-----------|------------|----------------------------|---------------------------------------|---------|
| DeA-7256  | 34         | Bulk peat (Sphagnum stems) | $-16 \pm 22$                          |         |
| DeA-7257  | 57         | Bulk peat (Sphagnum stems) | $236 \pm 23$                          |         |
| DeA-7258  | 72         | Bulk peat (Sphagnum stems) | $368 \pm 22$                          |         |
| DeA-7259  | 104        | Bulk peat (Sphagnum stems) | $805 \pm 22$                          |         |
| DeA-7260  | 129        | Bulk peat (Sphagnum stems) | $728 \pm 21$                          |         |
| DeA-7261  | 163        | Bulk peat (Sphagnum stems) | $1164 \pm 25$                         |         |
| DeA-5795  | 172.5      | wood                       | $3176 \pm 26$                         | Outlier |
| DeA-7262  | 200        | Bulk peat (Sphagnum stems) | $1417 \pm 26$                         |         |
| DeA-5796  | 209        | Bulk peat (Sphagnum stems) | $1560 \pm 27$                         |         |
| DeA-7263  | 228        | Bulk peat (Sphagnum stems) | $1809 \pm 22$                         |         |
| UBA-31373 | 252        | Bulk peat (Sphagnum stems) | $2228 \pm 44$                         |         |
| UBA-31374 | 280        | Bulk peat (Sphagnum stems) | $2202 \pm 44$                         |         |
| DeA-7264  | 314        | Bulk peat (Sphagnum stems) | $2595 \pm 24$                         |         |
| UBA-31375 | 344        | Bulk peat (Sphagnum stems) | $3023 \pm 30$                         |         |
| UBA-31376 | 378        | Bulk peat (Sphagnum stems) | $3317 \pm 50$                         |         |
| DeA-7265  | 404        | Bulk peat (Sphagnum stems) | $3638 \pm 29$                         |         |
| UBA-31377 | 454        | Bulk peat (Sphagnum stems) | $4181 \pm 32$                         |         |
| DeA-5797  | 516        | Bulk peat (Sphagnum stems) | $5301 \pm 36$                         |         |
| UBA-31378 | 603        | Bulk peat (Sphagnum stems) | $6777 \pm 54$                         |         |

### Mohos

| Lab Code  | Depth (cm) | Material dated             | $^{14}\text{C}$ Age ( $\pm 1\sigma$ ) | Remarks |
|-----------|------------|----------------------------|---------------------------------------|---------|
| DeA-8343  | 50         | Bulk peat (Sphagnum stems) | $37 \pm 18$                           |         |
| DeA-8344  | 100        | Bulk peat (Sphagnum stems) | $838 \pm 19$                          |         |
| DeA-10111 | 150        | Bulk peat (Sphagnum stems) | $1174 \pm 28$                         |         |
| DeA-10112 | 175        | Bulk peat (Sphagnum stems) | $1471 \pm 26$                         |         |
| DeA-8345  | 200        | Bulk peat (Sphagnum stems) | $2022 \pm 21$                         |         |
| DeA-10137 | 225        | Bulk peat (Sphagnum stems) | $2155 \pm 27$                         |         |
| DeA-10138 | 280        | Bulk peat (Sphagnum stems) | $2530 \pm 28$                         |         |
| DeA-8346  | 300        | Bulk peat (Sphagnum stems) | $3112 \pm 23$                         |         |
| DeA-10139 | 350        | Bulk peat (Sphagnum stems) | $4110 \pm 31$                         |         |
| DeA-10140 | 380        | Bulk peat (Sphagnum stems) | $4641 \pm 54$                         |         |
| DeA-8347  | 400        | Bulk peat (Sphagnum stems) | $4638 \pm 26$                         |         |
| DeA-10141 | 500        | Bulk peat (Sphagnum stems) | $5949 \pm 36$                         |         |
| DeA-10142 | 600        | Bulk peat (Sphagnum stems) | $6989 \pm 43$                         |         |
| DeA-8348  | 700        | Bulk peat (Sphagnum stems) | $7909 \pm 33$                         |         |
| DeA-10143 | 800        | Bulk peat (Sphagnum stems) | $8687 \pm 45$                         |         |
| DeA-8349  | 900        | Bulk peat (Sphagnum stems) | $9273 \pm 36$                         |         |

### Crveni Potok

| <b>Lab Code</b> | <b>Depth (cm)</b> | <b>Material dated</b>                                                         | <b>14 C Age (<math>\pm 1\sigma</math>)</b> | <b>Remarks</b> |
|-----------------|-------------------|-------------------------------------------------------------------------------|--------------------------------------------|----------------|
| Poz-72891       | 18                | Sphagnum stems                                                                | 260 $\pm$ 30                               |                |
| Poz-72892       | 22                | 36 Picea sp. needle pits; 1 Abies sp. needle pits; Sphagnum stems             | 345 $\pm$ 30                               |                |
| Poz-58430       | 58                | Sphagnum stems; 1 Picea abies Seed; 6 Potentilla fruits; 1 Picea abies Needle | 2415 $\pm$ 30                              |                |
| Poz-55928       | 93                | Bark, indet.                                                                  | 3005 $\pm$ 35                              |                |
| Poz-55929       | 142               | Wood (Picea/Larix type)*                                                      | 4120 $\pm$ 35                              |                |
| Poz-58431       | 182               | Wood fragments (Larix/Picea or Pinus sp.)                                     | 5120 $\pm$ 35                              |                |
| Poz-55930       | 218               | Wood (Picea/Larix type) **                                                    | 6890 $\pm$ 40                              |                |
| Poz-55931       | 236               | Wood (Picea/Larix type)**                                                     | 7460 $\pm$ 40                              |                |
| Poz-55932       | 248               | Wood (Picea/Larix type)                                                       | 7920 $\pm$ 50                              |                |

### **Despotovac**

| <b>Lab Code</b> | <b>Depth (cm)</b> | <b>Material dated</b> | <b>14 C Age (<math>\pm 1\sigma</math>)</b> | <b>Remarks</b> |
|-----------------|-------------------|-----------------------|--------------------------------------------|----------------|
| DeA-7476        | 86.5              | Bulk sediment         | 541 $\pm$ 11                               |                |
| DeA-7477        | 193.5             | Bulk sediment         | 1019 $\pm$ 31                              |                |
| DeA-7478        | 267.5             | Bulk sediment         | 2989 $\pm$ 46                              |                |
| DeA-7479        | 395               | Bulk sediment         | 4091 $\pm$ 60                              |                |
| DeA-7480        | 465               | Bulk sediment         | 4528 $\pm$ 60                              |                |

### **Baia Vulturilor**

| <b>Lab Code</b> | <b>Depth (cm)</b> | <b>Material dated</b>      | <b>14 C Age (<math>\pm 1\sigma</math>)</b> | <b>Remarks</b> |
|-----------------|-------------------|----------------------------|--------------------------------------------|----------------|
| RAD-4-2016-1    | 19                | Bulk peat (Sphagnum stems) | 104.55 $\pm$ 1.44                          |                |
| RAD-4-2016-2    | 50                | Bulk peat (Sphagnum stems) | 757 $\pm$ 50                               |                |
| RAD-4-2016-3    | 79.5              | Bulk peat (Sphagnum stems) | 2230 $\pm$ 100                             |                |
| RAD-4-2016-4    | 108               | Bulk peat (Sphagnum stems) | 2534 $\pm$ 100                             |                |
| RAD-4-2016-5    | 144               | Bulk peat (Sphagnum stems) | 2820 $\pm$ 100                             |                |

### **Iezerul Mare**

| <b>Lab Code</b> | <b>Depth (cm)</b> | <b>Material dated</b>      | <b>14 C Age (<math>\pm 1\sigma</math>)</b> | <b>Remarks</b> |
|-----------------|-------------------|----------------------------|--------------------------------------------|----------------|
| IZM-1.1-30      | 30                | Bulk peat (Sphagnum stems) | 248 $\pm$ 31                               |                |
| IZM-1.1-80      | 80                | Bulk peat (Sphagnum stems) | 207 $\pm$ 30                               |                |
| IZM-1.3-130     | 130               | Bulk peat (Sphagnum stems) | 261 $\pm$ 32                               |                |
| IZM-1.3-180     | 180               | Bulk peat (Sphagnum stems) | 697 $\pm$ 29                               |                |
| IZM-1.5-230     | 230               | Bulk peat (Sphagnum stems) | 923 $\pm$ 30                               |                |
| IZM-1.5-282     | 282               | Bulk peat (Sphagnum stems) | 1093 $\pm$ 30                              |                |
| IZM-1.7-330     | 330               | Bulk peat (Sphagnum stems) | 1486 $\pm$ 30                              |                |

|              |     |                            |           |
|--------------|-----|----------------------------|-----------|
| IZM-1.7-380  | 380 | Bulk peat (Sphagnum stems) | 1957 ± 30 |
| IZM-1.9-430  | 430 | Bulk peat (Sphagnum stems) | 2191 ± 33 |
| IZM-1.9-480  | 480 | Bulk peat (Sphagnum stems) | 2500 ± 33 |
| IZM-1.11-530 | 530 | Bulk peat (Sphagnum stems) | 2909 ± 36 |
| IZM-1.11-580 | 580 | Bulk peat (Sphagnum stems) | 3403 ± 31 |
| IZM-1.13-630 | 630 | Bulk peat (Sphagnum stems) | 4118 ± 38 |
| IZM-1.13-680 | 680 | Bulk peat (Sphagnum stems) | 4522 ± 35 |
| IZM-1.17-730 | 730 | Bulk peat (Sphagnum stems) | 5109 ± 36 |
| IZM-1.17-790 | 790 | Bulk peat (Sphagnum stems) | 6123 ± 54 |

### Mluha

| Lab Code          | Depth (cm) | Material dated             | 14 C Age (±1σ) | Remarks |
|-------------------|------------|----------------------------|----------------|---------|
| DeA-3695          | 30         | Bulk peat (Sphagnum stems) | 76 ± 21        |         |
| DeA-3696          | 80         | Bulk peat (Sphagnum stems) | 209 ± 21       |         |
| DeA-3697          | 130        | Bulk peat (Sphagnum stems) | 583 ± 23       |         |
| DeA-3698          | 180        | Bulk peat (Sphagnum stems) | 990 ± 23       |         |
| DeA-5789          | 209.5      | Bulk peat (Sphagnum stems) | 1180 ± 27      |         |
| DeA-5790          | 219.5      | Bulk peat (Sphagnum stems) | 1436 ± 27      |         |
| DeA-3699          | 230        | Bulk peat (Sphagnum stems) | 1799 ± 23      |         |
| DeA-5791          | 239.5      | Bulk peat (Sphagnum stems) | 2078 ± 26      |         |
| DeA-5792          | 249.5      | Bulk peat (Sphagnum stems) | 2112 ± 26      |         |
| DeA-3700          | 280        | Bulk peat (Sphagnum stems) | 2459 ± 25      |         |
| DeA-5793          | 329.5      | Bulk peat (Sphagnum stems) | 2664 ± 27      |         |
| DeA-3702          | 378        | Bulk peat (Sphagnum stems) | 3290 ± 24      |         |
| RoAMS:<br>1399.87 | 429        | Bulk peat (Sphagnum stems) | 3873 ± 38      |         |
| DeA-5794          | 480.5      | Bulk peat (Sphagnum stems) | 4130 ± 30      |         |
| RoAMS:<br>1400.87 | 511        | Bulk peat (Sphagnum stems) | 4415 ± 39      |         |
| RoAMS:<br>1401.87 | 534        | Bulk peat (Sphagnum stems) | 5115 ± 40      |         |
| RoAMS:<br>1402.87 | 554        | Bulk peat (Sphagnum stems) | 5592 ± 43      |         |
| RoAMS:<br>1403.87 | 574        | Bulk peat (Sphagnum stems) | 6341 ± 45      |         |
| DeA-3703          | 590        | Bulk peat (Sphagnum stems) | 6730 ± 30      |         |

### Zanoaga Rosie

| Lab Code | Depth (cm) | Material dated             | 14 C Age (±1σ) | Remarks |
|----------|------------|----------------------------|----------------|---------|
| DeA-5798 | 23         | Bulk peat (Sphagnum stems) | 15 ± 24        |         |
| DeA-5799 | 41         | Bulk peat (Sphagnum stems) | 821 ± 24       |         |
| DeA-3680 | 58.5       | Bulk peat (Sphagnum stems) | 1959 ± 17      | Outlier |
| DeA-8389 | 61.5       | Bulk peat (Sphagnum stems) | 5525 ± 26      |         |
| DeA-8390 | 66.5       | Bulk peat (Sphagnum stems) | 6411 ± 27      |         |

|          |       |                            |            |
|----------|-------|----------------------------|------------|
| DeA-5784 | 77.5  | Bulk peat (Sphagnum stems) | 7121 ± 32  |
| DeA-5780 | 95.5  | Bulk peat (Sphagnum stems) | 7280 ± 38  |
| DeA-3681 | 114.5 | Bulk peat (Sphagnum stems) | 7654 ± 25  |
| DeA-3682 | 158.5 | Bulk peat (Sphagnum stems) | 8308 ± 26  |
| DeA-5785 | 171   | Bulk peat (Sphagnum stems) | 8505 ± 34  |
| DeA-5786 | 187.5 | Bulk peat (Sphagnum stems) | 9566 ± 38  |
| DeA-3683 | 209.5 | Bulk peat (Sphagnum stems) | 11082 ± 33 |

Supplementary Table 2: Averages and standard deviations for the variables used in the Monte Carlo modelling.

| Variable               | Unit               | Average | Standard Deviation | Reference   |
|------------------------|--------------------|---------|--------------------|-------------|
| Carbon content         | %                  | 50.31   | 10.87              | This study  |
| Bulk density           | g cm <sup>-3</sup> | 0.16    | 0.08               | This study  |
| Oligotrophic bog area  | km <sup>2</sup>    | 13.53   | 1.37               | (Pop, 1960) |
| Eutrophic bog area     | km <sup>2</sup>    | 57.31   | 5.66               | (Pop, 1960) |
| Oligotrophic bog depth | cm                 | 201.62  | 20.08              | (Pop, 1960) |
| Eutrophic bog depth    | cm                 | 90.84   | 6.44               | (Pop, 1960) |

Supplementary Table 3: Correlation coefficients and p-values between dust deposition and modelled climate data, for a selection of times periods.

| All                | Pearson's r | p-value |
|--------------------|-------------|---------|
| Mean Precip        | 0.20        | 0.05    |
| Precip Seasonality | -0.35       | 0.00    |
| Area Mean          | 0.15        | 0.12    |
| Min Temp           | -0.06       | 0.54    |
| Max Temp           | 0.19        | 0.05    |
| Diurnal range      | 0.20        | 0.05    |
| Annual range       | -0.22       | 0.02    |
| Isothermality      | 0.29        | 0.00    |
| Temp seasonality   | -0.26       | 0.01    |

| 5000-4000 yr BP    | Pearson's r | p-value |
|--------------------|-------------|---------|
| Mean Precip        | -0.09       | 0.70    |
| Precip Seasonality | -0.15       | 0.49    |
| Area Mean          | -0.20       | 0.35    |
| Min Temp           | 0.03        | 0.90    |
| Max Temp           | -0.53       | 0.01    |
| Diurnal range      | -0.44       | 0.03    |
| Annual range       | -0.21       | 0.34    |
| Isothermality      | -0.05       | 0.82    |

|                  |       |      |
|------------------|-------|------|
| Temp seasonality | -0.33 | 0.12 |
|------------------|-------|------|

| <b>3950-3000 yr BP</b> | <b>Pearson's r</b> | <b>p-value</b> |
|------------------------|--------------------|----------------|
| Mean Precip            | -0.27              | 0.22           |
| Precip Seasonality     | -0.04              | 0.86           |
| Area Mean              | -0.18              | 0.42           |
| Min Temp               | -0.10              | 0.64           |
| Max Temp               | -0.10              | 0.66           |
| Diurnal range          | 0.02               | 0.92           |
| Annual range           | 0.08               | 0.71           |
| Isothermality          | -0.08              | 0.72           |
| Temp seasonality       | 0.10               | 0.67           |

| <b>2950-2000 yr BP</b> | <b>Pearson's r</b> | <b>p-value</b> |
|------------------------|--------------------|----------------|
| Mean Precip            | -0.22              | 0.30           |
| Precip Seasonality     | -0.48              | 0.02           |
| Area Mean              | -0.57              | 0.00           |
| Min Temp               | -0.41              | 0.05           |
| Max Temp               | -0.37              | 0.07           |
| Diurnal range          | 0.21               | 0.34           |
| Annual range           | 0.32               | 0.14           |
| Isothermality          | -0.19              | 0.40           |
| Temp seasonality       | 0.19               | 0.40           |

| <b>1950-1000 yr BP</b> | <b>Pearson's r</b> | <b>p-value</b> |
|------------------------|--------------------|----------------|
| Mean Precip            | 0.01               | 0.95           |
| Precip Seasonality     | 0.08               | 0.73           |
| Area Mean              | 0.36               | 0.09           |
| Min Temp               | 0.29               | 0.17           |
| Max Temp               | 0.07               | 0.75           |
| Diurnal range          | -0.31              | 0.15           |
| Annual range           | 0.12               | 0.58           |
| Isothermality          | -0.29              | 0.18           |
| Temp seasonality       | -0.07              | 0.77           |

| <b>1000-Present yr BP</b> | <b>Pearson's r</b> | <b>p-value</b> |
|---------------------------|--------------------|----------------|
| Mean Precip               | 0.22               | 0.32           |
| Precip Seasonality        | -0.14              | 0.51           |
| Area Mean                 | -0.38              | 0.07           |
| Min Temp                  | -0.44              | 0.03           |
| Max Temp                  | -0.30              | 0.16           |
| Diurnal range             | 0.36               | 0.09           |
| Annual range              | 0.08               | 0.71           |



|                  |      |      |
|------------------|------|------|
| Isothermality    | 0.12 | 0.58 |
| Temp seasonality | 0.19 | 0.38 |

---

## Supplementary References

- Blaauw, M., & Christen, J. A. (2011). Flexible paleoclimate age-depth models using an autoregressive gamma process. *Bayesian Analysis*, 6(3), 457–474. <https://doi.org/10.1214/11-BA618>
- Pop, E. (1960). *Mlaștinile de turbă din Republica Populară Română (Peat bogs from Romania)*. Bucharest: Editura Academiei Republicii Populare Române.
- Reimer, P. J., Austin, W. E. N., Bard, E., Bayliss, A., Blackwell, P. G., Bronk Ramsey, C., et al. (2020). The IntCal20 Northern Hemisphere Radiocarbon Age Calibration Curve (0-55 cal kBP). *Radiocarbon*, 62(4), 725–757. <https://doi.org/10.1017/RDC.2020.41>
- RStudio Team (2020). RStudio: Integrated Development for R. RStudio, PBC, Boston, MA URL <http://www.rstudio.com/>.
